# Supplementary material
Source: PubMed Central journal article supplement (PMC5473776)

**SUPPLEMENTAL MATERIAL.****Material and Methods.***Participants.*

Twenty three hospitals from the Spanish territory participated in the GRECOS project, the list of participants is available in the Supplemental Figure I.

*Variables definition: cohort A, B and C.*

-Hypertension was defined as systolic blood pressure (BP)  $\geq 140$  mmHg, diastolic BP  $\geq 90$  mmHg and/or use of antihypertensive medication.

-Diabetes mellitus was defined as fasting glucose levels over 7 mmol/L and/or the use of oral antidiabetic drugs or insulin.

-Dyslipidemia was defined as total cholesterol over 5.2 mmol/L, triglycerides over 2.3 mmol/L and/or the use of lipid lowering treatments.

-Alcohol abuse was defined as  $\geq 280$  grams per week in males and  $\geq 170$  grams per week in females.

-Smoking habit was categorized into current, former or never.

-Previous cardiovascular disease includes coronary artery disease (angina and/or myocardial infarction)

Other clinical risk factors were assessed reviewing the clinical records during hospitalization.

Analytical variables such as leukocytes or cholesterol levels were obtained during the acute phase of stroke (<24h).

NIHSS score was obtained during the acute phase of stroke and at discharge.

mRS score was obtained during the acute phase of stroke and at third month.

Stroke subtypes were defined by TOAST classification (1).

*VISP project (Cohort D).*

The VISP trial was a multi-center, double-blind, randomized, controlled clinical trial which enrolled patients aged 35 or older with homocysteine levels above the 25th percentile at screening and a non-disabling cerebral infarction (NDCI) within 120 days of randomization (2, 3). NDCI was defined as an ischemic brain infarction not due to embolism from a cardiac source, characterized by the sudden onset of a neurological deficit. The deficit must have persisted for at least 24 hours, or if not, an infarction in the part of the brain corresponding to the symptoms must have been demonstrated by CT or MRI imaging. The trial was designed to determine if daily intake of a multivitamin tablet with high dose folic acid, vitamin B<sub>6</sub> and vitamin B<sub>12</sub> reduced recurrent cerebral infarction and nonfatal myocardial infarction (MI) or mortality. Subjects were randomly assigned to receive daily doses of the high-dose formulation (n=1,827), containing 25mg pyridoxine (B<sub>6</sub>), 0.4mg cobalamin (B<sub>12</sub>), and 2.5mg folic acid; or the low-dose formulation (n=1,853), containing 200µg pyridoxine, 6µg cobalamin and 20µg folic acid. Enrollment in VISP began in August 1997, and was completed in December 2001, with 3,680 participants enrolled from 55 clinic sites across the U.S. and Canada and one site in Scotland.

*Exclusion criteria for the VISP trial included the following:*

-Stroke due to any form of intracranial hemorrhage, dissection of a cervicocephalic artery, veno-occlusive disease, drug abuse, or vasculitis;

-CT or MRI of the brain showing lesion other than ischemic infarction as cause of syndrome;

-Modified Rankin score of four or five at the time of eligibility determination;

- Presence of specific potential sources of cardiogenic emboli: atrial fibrillation within 30 days of stroke; or history of prosthetic cardiac valve, intracardiac thrombus or neoplasm, or valvular vegetation;
- Presence of major neurological illness apart from stroke that would prevent proper evaluation of recurrent stroke;
- Presence of cancer, pulmonary disease, or other illness which, in the opinion of the study physician, would limit the life expectancy of the patient to less than 2 years;
- Severe congestive heart failure;
- Renal insufficiency requiring dialysis;
- Untreated pernicious anemia or untreated B12 deficiency;
- Uncontrolled hypertension defined as systolic blood pressure >185 mm or diastolic >105 mm on two readings separated by 5 min at time of eligibility determination;
- Conditions that prevent reliable participation in the study, such as refractory depression, severe cognitive impairment, alcoholism, or other substance abuse;
- Use of medications (within the last 30 days) that affect homocyst(e)ine: methotrexate, tamoxifen, L-dopa, or phenytoin or bile acid sequestrants that can decrease folate levels;
- Woman of childbearing potential, defined as not having reached menopause (natural or surgical) or having had tubal ligation;
- Participation in another trial in which active intervention is being received;
- Patients on multivitamin supplements or single vitamins of B6 or folic acid will be excluded unless they are willing to take the study supplements in place of the one(s) they usually take;
- Any surgical procedure requiring a general anesthesia or hospital stay of 3 days or more, any type of invasive cardiac instrumentation, or an endarterectomy, stent placement, thrombectomy, or any other endovascular treatment of an abnormal carotid artery performed within 30 days prior to randomization or scheduled to be performed within 30 days after randomization

*Variables definition: VISP project (cohort D).*

Alcohol intake was determined from a dietary intake form in which patients were asked whether they drink or do not drink alcohol.

Tobacco use was defined as self-reported smoking at baseline.

Hypertension: Self-reported (i.e. "Has a doctor ever said you had any of the following... High blood pressure or hypertension")

Diabetes: Self-reported.

NIHSS score was obtained during hospitalization.

mRS score was obtained during hospitalization.

Analytical values were obtained during hospitalization.

A subset of VISP participants provided consent for inclusion in genetic studies. These participants were included in the GWAS component of VISP, supported by the National Human Genome Research Institute (NHGRI), Grant U01 HG005160, as part of the Genomics and Randomized Trials Network (GARNET). Samples were genotyped at the Johns Hopkins Center for Inherited Disease Research (CIDR), using the Illumina HumanOmni1-Quad\_v1-0\_B BeadChip (Illumina, San Diego, CA, USA). Individuals were excluded if they were unexpected duplicates or had gender discrepancies. A total of 2,100 individuals were included in the final genetic analyses, the samples with recurrence data were 1,683 (1,501 controls (ischemic stroke patients without ischemic stroke recurrence and 182 cases (ischemic stroke patients with ischemic stroke recurrence)).

Individuals were excluded if they were unexpected duplicates or had gender discrepancies.

Imputation for rs1800168 was performed using MACH version 1.0.16

(<http://www.sph.umich.edu/csg/abecasis/MACH/>).

*Candidate genes selection.*

Candidate genes were selected by manual searching Pubmed using the keywords “stroke, hypertension, inflammation, drug metabolism, coagulation, diabetes mellitus or diabetes, angiogenesis, myocardial infarction, atherosclerosis, lipid metabolism” for phenotypes and the keywords “polymorphism, SNP, mutation, variant” for polymorphisms. Pathways analyzed were related to stroke risk (hypertension, diabetes mellitus, lipid metabolism and myocardial infarction), t-PA targets (coagulation) and catabolizers (drugs metabolism) and further processes linked to good (angiogenesis) and bad (inflammation) outcome after ischemia. Only articles in English or Spanish were read. Among candidate genes, SNP selection was performed depending on previous literature, and their functional effect, including those with an already known modification at transcription, translation or protein activity or a hypothetic modification based on an aminoacid substitution. We selected the SNP that has been associated with the risk factor for stroke risk and/or a functional activity observed. Whenever an interesting polymorphism involved more than a single nucleotide change (e.g. Angiotensin I/D variant), a SNP in perfect linkage disequilibrium was chosen for genotyping.

In addition, we followed the recommendations of Pettersson et al (4), indicating that it is important to select those SNPs with an implication in the disease or pathway or with a demonstrated functional association with the activity of the gene or the protein codified in the gene. Candidate genes that are selected entirely on the basis of their supposed biological significance, without any evidence that the region they are located in is implicated, have very low success rates. Candidate gene studies should therefore follow association studies which have already implicated the gene, or follow from the proven involvement of a particular biological pathway in which other associated gene(s) already have been identified, and in which the candidate gene of interest plays a role. Indicating that it is important to select those SNPs with an implication in the disease or pathway or with a demonstrated functional association with the activity of the gene or the protein codified in the gene.

**Supplemental references**

1-Adams HP, Bendixen BH, Kappelle LJ, Biller J, Love BB, Gordon DL, et al. 3<sup>rd</sup>. Classification of subtype of acute ischemic stroke: definitions for use in a multicenter clinical trial. TOAST. Trial of Org 10172 in Acute Stroke Treatment. *Stroke* 1993; 24:35-41.

2-Spence JD, Howard VJ, Chambless LE, Malinow MR, Pettigrew LC, Stampfer M, et al. Vitamin Intervention for Stroke Prevention (VISP) trial: rationale and design. *Neuroepidemiology* 2001; 20:16-25.

3-Toole JF. Vitamin intervention for stroke prevention. *J Neurol Sci* 2002; 15;203-204:121-4.

4-Pettersson FH, Anderson CA, Clarke GM, Barrett JC, Cardon LR, Morris AP, et al. Marker selection for genetic case-control association studies. *Nat Protoc* 2009;4:743-752.

**Supplemental legends.**

**Supplemental Figure I:** Hospitals that participated in the GRECOS study. Numbers of patients recruited before removing hemorrhagic stroke patients, patients with low DNA concentration, low genotyping, and before exclusion criteria and inclusion criteria checking. Y axis: number of patients, X axis: name of the hospital. VH: Vall d'Hebron Hospital, BH: Bellvitge Hospital, SCH, Hospital Universitari Sagrat Cor, MH: Mataró Hospital, BAH: Basurto Hospital, TH: Josep Trueta Hospital, GTPH: Germans Tries i Pujols Hospital, VAH: Valladolid Hospital, Virgen del Rocio Hospital, DH: Donosti Hospital, RyCH: Ramon y Cajal Hospital, PTH: Parc Taulí Hospital, SPH: Sant Pau Hospital, VdNH: Virgen de las Nieves Hospital, dMH: del Mar Hospital, LLH: Lleida Hospital, GH: Granollers Hospital, MTH: Mutua de Terrassa Hospital, NH: Navarra Hospital, LBH: Lozano Blesa Hospital.

**Supplemental Table I:** List of SNPs genotyped. SNP: Single nucleotide polymorphism, CHR: Chromosome.

**Supplemental Table II Clinical and demographic description variables Discovery cohort (Cohort A).** Categorical variables and continuous variables.

**Supplemental Table III:** SNPs associated with ischemic stroke recurrence in a dominant-recessive model in the Discovery cohort A; SNPs associated with vascular recurrence in a dominant-recessive model in the Discovery cohort A; SNPs associated with vascular recurrence in an additive model in the Discovery cohort A. RG: Risk genotype, OR: Odds Ratio, CI: confidence interval, Dom/Rec: Dominant Recessive model, HZ: Hazard Ratio.

**Supplemental Table IV: SNPs associated with ischemic stroke recurrence in an additive model in the Discovery cohort A.** Risk allele, HZ: Hazard Ratio, CI: confidence interval.

**Supplementary Table V:** Clinical and demographic data of VISP cohort, categorical variables and continuous variables.

**Supplemental Table VI. Clinical and demographic description variables Replication cohorts B+C, N=1305.** Categorical variables and continuous variables.

**Supplemental Table I: Polymorphisms genotyped**

| <b>Biologic Pathway</b> | <b>GENE</b>    | <b>SNP</b> | <b>CHR</b> |
|-------------------------|----------------|------------|------------|
| Angiogenesis            | <i>ABAC</i>    | rs28587567 | 9          |
| Angiogenesis            | <i>ABAC</i>    | rs2230806  | 9          |
| Angiogenesis            | <i>EDN</i>     | rs5370     | 6          |
| Angiogenesis            | <i>FGF</i>     | rs1449683  | 4          |
| Angiogenesis            | <i>HTR</i>     | rs6311     | 13         |
| Angiogenesis            | <i>ICAM</i>    | rs1799969  | 19         |
| Angiogenesis            | <i>PARP</i>    | rs1136410  | 1          |
| Angiogenesis            | <i>VCAM</i>    | rs1041163  | 1          |
| Angiogenesis            | <i>VEGFA</i>   | rs2010963  | 6          |
| Angiogenesis            | <i>VEGFA</i>   | rs3025042  | 6          |
| Angiogenesis            | <i>VEGFA</i>   | rs3024994  | 6          |
| Angiogenesis            | <i>VEGFA</i>   | rs3025000  | 6          |
| Angiogenesis            | <i>VEGFA</i>   | rs3025010  | 6          |
| Angiogenesis            | <i>VEGFA</i>   | rs3025030  | 6          |
| Angiogenesis            | <i>VEGFA</i>   | rs3025033  | 6          |
| Angiogenesis            | <i>VEGFA</i>   | rs3025035  | 6          |
| Diabetes Mellitus       | <i>ADIPOQ</i>  | rs2241766  | 3          |
| Diabetes Mellitus       | <i>ADIPOQ</i>  | rs1501299  | 3          |
| Diabetes Mellitus       | <i>ADAMTS9</i> | rs4607103  | 3          |
| Diabetes Mellitus       | <i>CDKAL1</i>  | rs6931514  | 6          |
| Diabetes Mellitus       | <i>ENPP</i>    | rs1044498  | 6          |
| Diabetes Mellitus       | <i>GCKR</i>    | rs1260326  | 2          |
| Diabetes Mellitus       | <i>GRM3</i>    | rs6465084  | 7          |
| Diabetes Mellitus       | <i>HHEX</i>    | rs5015480  | 10         |
| Diabetes Mellitus       | <i>HNF4A</i>   | rs2144908  | 20         |
| Diabetes Mellitus       | <i>CDC123</i>  | rs12779790 | 10         |
| Diabetes Mellitus       | <i>IGF1R</i>   | rs2229765  | 15         |
| Diabetes Mellitus       | <i>IGFBP2</i>  | rs4402960  | 3          |
| Diabetes Mellitus       | <i>IGFBP3</i>  | rs2854744  | 7          |
| Diabetes Mellitus       | <i>JAZF1</i>   | rs864745   | 7          |
| Diabetes Mellitus       | <i>LGR5</i>    | rs7961581  | 12         |
| Diabetes Mellitus       | <i>TCF7L2</i>  | rs7903146  | 10         |
| Diabetes Mellitus       | <i>THADA</i>   | rs7578597  | 2          |
| Diabetes Mellitus       | <i>PPARA</i>   | rs1800206  | 22         |
| Drug metabolism         | <i>CYP11B2</i> | rs1799998  | 8          |
| Drug metabolism         | <i>GST</i>     | rs3211206  | 1          |
| Drug metabolism         | <i>GSTO</i>    | rs4925     | 10         |
| Drug metabolism         | <i>GSTP</i>    | rs1695     | 11         |
| Drug metabolism         | <i>MGP</i>     | rs1800801  | 12         |
| Drug metabolism         | <i>MTHFR</i>   | rs1801131  | 1          |
| Drug metabolism         | <i>MTHFR</i>   | rs1801133  | 1          |
| Drug metabolism         | <i>PTGS</i>    | rs3842787  | 9          |
| Drug metabolism         | <i>PTGS</i>    | rs20417    | 1          |
| Drug metabolism         | <i>CYP2C19</i> | rs12571421 | 10         |

|                          |                |            |    |
|--------------------------|----------------|------------|----|
| Drug metabolism          | <i>TP53</i>    | rs1042522  | 17 |
| Drug metabolism          | <i>VKORC</i>   | rs2359612  | 16 |
| Fibrinolysis/coagulation | <i>ANAX5</i>   | rs11575945 | 4  |
| Fibrinolysis/coagulation | <i>CYP2C</i>   | rs1057910  | 10 |
| Fibrinolysis/coagulation | <i>F12</i>     | rs1801020  | 5  |
| Fibrinolysis/coagulation | <i>F2</i>      | rs1799963  | 11 |
| Fibrinolysis/coagulation | <i>F8</i>      | rs1800291  | 23 |
| Fibrinolysis/coagulation | <i>FGA</i>     | rs6050     | 4  |
| Fibrinolysis/coagulation | <i>FGB</i>     | rs1800790  | 4  |
| Fibrinolysis/coagulation | <i>PLAT</i>    | rs2020918  | 8  |
| Fibrinolysis/coagulation | <i>PLAU</i>    | rs2227564  | 10 |
| Fibrinolysis/coagulation | <i>PROC</i>    | rs1799810  | 2  |
| Fibrinolysis/coagulation | <i>PROS1</i>   | rs6123     | 3  |
| Fibrinolysis/coagulation | <i>RETN</i>    | rs1862513  | 19 |
| Fibrinolysis/coagulation | <i>SERPINE</i> | rs1799768  | 7  |
| Fibrinolysis/coagulation | <i>SERPINE</i> | rs7242     | 7  |
| Fibrinolysis/coagulation | <i>TAFI</i>    | rs1926447  | 13 |
| Fibrinolysis/coagulation | <i>THBD</i>    | rs1042579  | 20 |
| Fibrinolysis/coagulation | <i>VWF</i>     | rs2239162  | 12 |
| Fibrinolysis/coagulation | <i>VWF</i>     | rs1063856  | 12 |
| Hypertension             | <i>ACE</i>     | rs4341     | 17 |
| Hypertension             | <i>ADRB2</i>   | rs1042713  | 5  |
| Hypertension             | <i>ADRB2</i>   | rs1042714  | 5  |
| Hypertension             | <i>ADRB2</i>   | rs1800888  | 5  |
| Hypertension             | <i>ADRB3</i>   | rs4994     | 8  |
| Hypertension             | <i>AGTR1</i>   | rs5186     | 3  |
| Hypertension             | <i>SCNN1A</i>  | rs5742912  | 12 |
| Inflammation             | <i>CD40</i>    | rs1883832  | 20 |
| Inflammation             | <i>CRP</i>     | rs1205     | 1  |
| Inflammation             | <i>CRP</i>     | rs1130864  | 1  |
| Inflammation             | <i>CRP</i>     | rs1800947  | 1  |
| Inflammation             | <i>IFNG</i>    | rs2430561  | 12 |
| Inflammation             | <i>IL10</i>    | rs1800872  | 1  |
| Inflammation             | <i>IL10</i>    | rs1800896  | 1  |
| Inflammation             | <i>IL13</i>    | rs1295686  | 5  |
| Inflammation             | <i>IL1A</i>    | rs1800587  | 2  |
| Inflammation             | <i>IL1B</i>    | rs1143634  | 2  |
| Inflammation             | <i>IL1B</i>    | rs1143627  | 2  |
| Inflammation             | <i>IL1B</i>    | rs16944    | 2  |
| Inflammation             | <i>IL4R</i>    | rs1805015  | 16 |
| Inflammation             | <i>IL4R</i>    | rs1801275  | 16 |
| Inflammation             | <i>IL5</i>     | rs2069812  | 5  |
| Inflammation             | <i>IL5RA</i>   | rs2290608  | 3  |
| Inflammation             | <i>IL6</i>     | rs1800797  | 7  |
| Inflammation             | <i>IL6</i>     | rs1800796  | 7  |
| Inflammation             | <i>IL6</i>     | rs1800795  | 7  |
| Inflammation             | <i>IL9</i>     | rs2069885  | 5  |
| Inflammation             | <i>ITGA2</i>   | rs1126643  | 5  |

|                  |                 |            |    |
|------------------|-----------------|------------|----|
| Inflammation     | <i>MCPI</i>     | rs1024611  | 17 |
| Inflammation     | <i>MMP1</i>     | rs1799750  | 11 |
| Inflammation     | <i>MMP10</i>    | rs486055   | 11 |
| Inflammation     | <i>MMP12</i>    | rs2276109  | 11 |
| Inflammation     | <i>MMP13</i>    | rs2252070  | 11 |
| Inflammation     | <i>MMP2</i>     | rs243864   | 16 |
| Inflammation     | <i>MMP3</i>     | rs3025058  | 11 |
| Inflammation     | <i>MMP7</i>     | rs11568818 | 11 |
| Inflammation     | <i>MMP8</i>     | rs1320632  | 11 |
| Inflammation     | <i>MMP9</i>     | rs3918248  | 20 |
| Inflammation     | <i>MMP9</i>     | rs2274756  | 20 |
| Inflammation     | <i>MMP9</i>     | rs8113877  | 20 |
| Inflammation     | <i>MMP9</i>     | rs3918278  | 20 |
| Inflammation     | <i>MMP9</i>     | rs3918241  | 20 |
| Inflammation     | <i>MMP9</i>     | rs3918253  | 20 |
| Inflammation     | <i>MMP9</i>     | rs2274755  | 20 |
| Inflammation     | <i>MMP9</i>     | rs2236416  | 20 |
| Inflammation     | <i>MMP9</i>     | rs3918256  | 20 |
| Inflammation     | <i>MMP9</i>     | rs3787268  | 20 |
| Inflammation     | <i>MMP9</i>     | rs2250889  | 20 |
| Inflammation     | <i>NOS2A</i>    | rs1137933  | 17 |
| Inflammation     | <i>NOS3</i>     | rs4722204  | 7  |
| Inflammation     | <i>NOS3</i>     | rs10266564 | 7  |
| Inflammation     | <i>NOS3</i>     | rs1800779  | 7  |
| Inflammation     | <i>NOS3</i>     | rs2070744  | 7  |
| Inflammation     | <i>NOS3</i>     | rs2257073  | 7  |
| Inflammation     | <i>NOS3</i>     | rs2257090  | 7  |
| Inflammation     | <i>NOS3</i>     | rs10275136 | 7  |
| Inflammation     | <i>NOS3</i>     | rs12703116 | 7  |
| Inflammation     | <i>NOS3</i>     | rs2243428  | 7  |
| Inflammation     | <i>NOS3</i>     | rs2288649  | 7  |
| Inflammation     | <i>NOS3</i>     | rs2435609  | 7  |
| Inflammation     | <i>NOS3</i>     | rs2487151  | 7  |
| Inflammation     | <i>NOS3</i>     | rs2435608  | 7  |
| Inflammation     | <i>NOS3</i>     | rs6952465  | 7  |
| Inflammation     | <i>NOS3</i>     | rs310590   | 7  |
| Inflammation     | <i>NOS3</i>     | rs310589   | 7  |
| Inflammation     | <i>NOS3</i>     | rs310588   | 7  |
| Inflammation     | <i>NOS3</i>     | rs310586   | 7  |
| Inflammation     | <i>NOS3</i>     | rs310585   | 7  |
| Inflammation     | <i>NOS3</i>     | rs310584   | 7  |
| Inflammation     | <i>SELE</i>     | rs5355     | 1  |
| Inflammation     | <i>SELE</i>     | rs5361     | 1  |
| Inflammation     | <i>SELP</i>     | rs6133     | 1  |
| Inflammation     | <i>TIMP1</i>    | rs2070584  | 23 |
| Inflammation     | <i>TNF</i>      | rs1800629  | 6  |
| Inflammation     | <i>TNFRSF1B</i> | rs1061622  | 1  |
| Lipid Metabolism | <i>APOB</i>     | rs1367117  | 2  |



|                       |                |            |    |
|-----------------------|----------------|------------|----|
| Lipid Metabolism      | <i>APOB</i>    | rs576203   | 2  |
| Lipid Metabolism      | <i>APOB</i>    | rs7575840  | 2  |
| Lipid Metabolism      | <i>APOB</i>    | rs693      | 2  |
| Lipid Metabolism      | <i>APOB</i>    | rs1713222  | 2  |
| Lipid Metabolism      | <i>APOC1</i>   | rs10402271 | 19 |
| Lipid Metabolism      | <i>APOC3</i>   | rs2854117  | 11 |
| Lipid Metabolism      | <i>APOE</i>    | rs405509   | 19 |
| Lipid Metabolism      | <i>APOE</i>    | rs7412     | 19 |
| Lipid Metabolism      | <i>APOH</i>    | rs1801692  | 17 |
| Lipid Metabolism      | <i>BCL3</i>    | rs4803750  | 19 |
| Lipid Metabolism      | <i>BCAM</i>    | rs4605275  | 19 |
| Lipid Metabolism      | <i>CETP</i>    | rs1800775  | 16 |
| Lipid Metabolism      | <i>CELSR2</i>  | rs646776   | 1  |
| Lipid Metabolism      | <i>CETP</i>    | rs5882     | 16 |
| Lipid Metabolism      | <i>HMGCR</i>   | rs12654264 | 5  |
| Lipid Metabolism      | <i>LEPR</i>    | rs1137101  | 1  |
| Lipid Metabolism      | <i>LIPC</i>    | rs1800588  | 15 |
| Lipid Metabolism      | <i>LPL</i>     | rs268      | 8  |
| Lipid Metabolism      | <i>LPL</i>     | rs328      | 8  |
| Lipid Metabolism      | <i>LRP1</i>    | rs12307379 | 12 |
| Lipid Metabolism      | <i>LRP1</i>    | rs11172113 | 12 |
| Lipid Metabolism      | <i>LRP1</i>    | rs17547610 | 12 |
| Lipid Metabolism      | <i>LRP1</i>    | rs4759044  | 12 |
| Lipid Metabolism      | <i>LRP1</i>    | rs715948   | 12 |
| Lipid Metabolism      | <i>LRP1</i>    | rs1800127  | 12 |
| Lipid Metabolism      | <i>LRP1</i>    | rs7398375  | 12 |
| Lipid Metabolism      | <i>LRP1</i>    | rs10876966 | 12 |
| Lipid Metabolism      | <i>LRP1</i>    | rs1800168  | 12 |
| Lipid Metabolism      | <i>LRP1</i>    | rs1800159  | 12 |
| Lipid Metabolism      | <i>LRP1</i>    | rs7956957  | 12 |
| Lipid Metabolism      | <i>NCAN</i>    | rs16996148 | 19 |
| Lipid Metabolism      | <i>OLRI</i>    | rs11053646 | 12 |
| Lipid Metabolism      | <i>PPARGC1</i> | rs8192678  | 4  |
| Lipid Metabolism      | <i>PCSK9</i>   | rs11206510 | 1  |
| Lipid Metabolism      | <i>TOMM40</i>  | rs2075650  | 19 |
| Lipid Metabolism      | <i>LDLR</i>    | rs2228671  | 19 |
| Lipid Metabolism      | <i>LDLR</i>    | rs11668477 | 19 |
| Lipid Metabolism      | <i>SREBF2</i>  | rs2269657  | 22 |
| Myocardial Infarction | <i>ESR1</i>    | rs9340799  | 6  |
| Myocardial Infarction | <i>ESR2</i>    | rs1255998  | 14 |
| Myocardial Infarction | <i>ESR3</i>    | rs1256030  | 14 |
| Myocardial Infarction | <i>PLA2G7</i>  | rs1051931  | 6  |
| Myocardial Infarction | <i>PON1</i>    | rs662      | 7  |
| Myocardial Infarction | <i>PON2</i>    | rs7493     | 7  |
| Myocardial Infarction | <i>MIA3</i>    | rs17465637 | 1  |
| Myocardial Infarction | <i>SMAD3</i>   | rs17228212 | 15 |
| Myocardial Infarction | <i>S100B</i>   | rs1051169  | 21 |
| Myocardial Infarction | <i>CXCL12</i>  | rs501120   | 10 |

|                       |                   |            |    |
|-----------------------|-------------------|------------|----|
| Myocardial Infarction | <i>CELSR2</i>     | rs599839   | 1  |
| Myocardial Infarction | <i>CDKN2A</i>     | rs10757278 | 9  |
| Stroke                | <i>A2M</i>        | rs669      | 12 |
| Stroke                | <i>AACT</i>       | rs4934     | 14 |
| Stroke                | <i>ADD1</i>       | rs4961     | 4  |
| Stroke                | <i>AIM1</i>       | rs783396   | 6  |
| Stroke                | <i>ALOX5AP</i>    | rs10507391 | 13 |
| Stroke                | <i>AMPD1</i>      | rs17602729 | 1  |
| Stroke                | <i>ANP</i>        | rs5065     | 1  |
| Stroke                | <i>ASTN2</i>      | rs3761845  | 9  |
| Stroke                | <i>CD14</i>       | rs2569190  | 5  |
| Stroke                | <i>CDH1</i>       | rs16260    | 16 |
| Stroke                | <i>CX3CR1</i>     | rs3732379  | 3  |
| Stroke                | <i>ELN</i>        | rs17855988 | 7  |
| Stroke                | <i>GJA1</i>       | rs17653265 | 6  |
| Stroke                | <i>GJA4</i>       | rs1764391  | 1  |
| Stroke                | <i>GNB3</i>       | rs5443     | 12 |
| Stroke                | <i>HIF1AN</i>     | rs2295778  | 10 |
| Stroke                | <i>IMPA2</i>      | rs7506045  | 18 |
| Stroke                | <i>KCNK17</i>     | rs1078911  | 6  |
| Stroke                | <i>KCNK17</i>     | rs10807204 | 6  |
| Stroke                | <i>LTA</i>        | rs909253   | 6  |
| Stroke                | <i>NEUROD1</i>    | rs1801262  | 2  |
| Stroke                | <i>P2RY1</i>      | rs1065776  | 3  |
| Stroke                | <i>PDE4D</i>      | rs1396476  | 5  |
| Stroke                | <i>PDE4D</i>      | rs2910829  | 5  |
| Stroke                | <i>PDE4D</i>      | rs966221   | 5  |
| Stroke                | <i>PDE4D</i>      | rs702553   | 5  |
| Stroke                | <i>PDE4D</i>      | rs152312   | 5  |
| Stroke                | <i>ROCK2</i>      | rs9808232  | 2  |
| Stroke                | <i>PITX2</i>      | rs2200733  | 4  |
| Stroke                | <i>PITX2</i>      | rs10014124 | 4  |
| Stroke                | <i>PITX2</i>      | rs10033464 | 4  |
| Stroke                | <i>Intergenic</i> | rs9536591  | 13 |
| Stroke                | <i>Intergenic</i> | rs10486776 | 7  |
| Stroke                | <i>ZFH3</i>       | rs7193343  | 16 |
| Stroke                | <i>COL11A2</i>    | rs1799908  | 6  |
| Other Processes       | <i>ICT1</i>       | rs1044228  | 17 |
| Other Processes       | <i>CHD2</i>       | rs10520716 | 15 |
| Other Processes       | <i>LOC643339</i>  | rs11106995 | 12 |
| Other Processes       | <i>CHD2</i>       | rs12438635 | 15 |
| Other Processes       | <i>Intergenic</i> | rs12732417 | 1  |
| Other Processes       | <i>Intergenic</i> | rs12777823 | 10 |
| Other Processes       | <i>CDKN2B-ABS</i> | rs1333049  | 9  |
| Other Processes       | <i>Intergenic</i> | rs1338500  | 1  |
| Other Processes       | <i>MC4R</i>       | rs17782313 | 18 |
| Other Processes       | <i>Intergenic</i> | rs180117   | 17 |
| Other Processes       | <i>A2M</i>        | rs1805651  | 12 |

|                 |                   |           |    |
|-----------------|-------------------|-----------|----|
| Other Processes | <i>ADAMTS7</i>    | rs1994016 | 15 |
| Other Processes | <i>Intergenic</i> | rs2184006 | 1  |
| Other Processes | <i>CDKN2B-AS1</i> | rs2383206 | 9  |
| Other Processes | <i>Intergenic</i> | rs2824292 | 21 |
| Other Processes | <i>CHD2</i>       | rs3826035 | 15 |
| Other Processes | <i>CELSR1</i>     | rs4044210 | 22 |
| Other Processes | <i>Intergenic</i> | rs4450014 | 1  |
| Other Processes | <i>Intergenic</i> | rs563280  | 2  |
| Other Processes | <i>DMPK</i>       | rs572634  | 19 |
| Other Processes | <i>Intergenic</i> | rs6664786 | 1  |
| Other Processes | <i>CHD2</i>       | rs7164668 | 15 |
| Other Processes | <i>CHD2</i>       | rs7173103 | 15 |
| Other Processes | <i>ICT1</i>       | rs902726  | 17 |
| Other Processes | <i>Intergenic</i> | rs9289423 | 3  |
| Other Processes | <i>CHD2</i>       | rs961233  | 15 |
| Other Processes | <i>CELSR1</i>     | rs9615978 | 22 |
| Other Processes | <i>Intergenic</i> | rs9644872 | 9  |
| Other Processes | <i>Intergenic</i> | rs9819617 | 3  |
| Other Processes | <i>Intergenic</i> | rs9824398 | 3  |
| Other Processes | <i>FTO</i>        | rs9939609 | 16 |

**Supplemental Table II**

| <b>Clinical and demographic variables. Categorical variables.</b> | <b>Frequency (n)</b>             |
|-------------------------------------------------------------------|----------------------------------|
| <i>Clinical variables at enrollment</i>                           |                                  |
| Female                                                            | 37.9% (565)                      |
| Tobacco use                                                       | 51.8% (743)                      |
| Alcohol intake                                                    | 30% (415)                        |
| Low physical activity                                             | 34.8% (355)                      |
| Presence of Hypertension                                          | 60.5% (886)                      |
| Presence of Dyslipidemia                                          | 37.6% (546)                      |
| Presence of Diabetes Mellitus                                     | 27.5% (401)                      |
| Previous Angina Pectoris                                          | 8.1% (119)                       |
| Previous Myocardial Infarction (MI)                               | 6.4% (94)                        |
| Previous Atrial Fibrillation                                      | 15.8% (234)                      |
| Previous Carotid Stenosis (>50%)                                  | 1.3% (15)                        |
| Previous Leukoaraiosis                                            | 11.7% (133)                      |
| Previous Deep Venous Thrombosis                                   | 2.5% (37)                        |
| Previous Diabetic Nephropathy                                     | 3.9% (57)                        |
| Previous Dementia                                                 | 2.6% (38)                        |
| Previous Migraine                                                 | 3.1% (45)                        |
| Previous Sleep Apnea Syndrome                                     | 4.1% (59)                        |
| Familial History of Stroke                                        | 24.5% (321)                      |
| Familial History of MI or Angina Pectoris                         | 13.3% (172)                      |
| Familial History of Dementia                                      | 8.3% (107)                       |
| <i>Clinical variables after recruitment</i>                       |                                  |
| Inclusion TIA                                                     | 7.9% (117)                       |
| Carotid revascularization                                         | 5.7% (76)                        |
| Presence of intracranial stenosis                                 | 16% (148)                        |
| Administration of rt-PA                                           | 18.7% (270)                      |
| Vascular Recurrence                                               | 10.2% (137)                      |
| Ischemic Stroke Recurrence                                        | 6.7% (90)                        |
| TOAST                                                             |                                  |
| Large Vessel Stroke                                               | 20.6% (299)                      |
| Cardioembolism                                                    | 26.8% (389)                      |
| Small Vessel Disease                                              | 14.4% (209)                      |
| Undetermined >2 causes                                            | 3.2% (47)                        |
| Undetermined (study completed)                                    | 8.3% (120)                       |
| Undetermined (uncompleted study)                                  | 22.8% (330)                      |
| Clopidogrel administration                                        | 21.2% (297)                      |
| Diuretics administration                                          | 18.1% (253)                      |
| B-blockers administration                                         | 12.4% (174)                      |
| Oral antidiabetic drugs administration                            | 15.9% (223)                      |
| <b>Clinical and demographic variables. Continuous variables.</b>  |                                  |
| <i>Clinical variables at enrollment</i>                           |                                  |
| Age, years (mean, median)                                         | 68 years (24-98 years), 71 years |
| Weight (kilograms, median)                                        | 73 Kg                            |
| Height (cm, median)                                               | 165 cm                           |
| Red blood cells (count, median)                                   | 4510000 /mm <sup>3</sup>         |
| Hemoglobin (median)                                               | 14.2 g/dL                        |
| Platelets (count, median)                                         | 215700 /mm <sup>3</sup>          |
| Leukocytes (count, median)                                        | 7770 /mm <sup>3</sup>            |

|                             |                  |
|-----------------------------|------------------|
| Cholesterol (median)        | 182 mg/dl        |
| HDL (median)                | 43 mg/dl         |
| LDL (median)                | 111 mg/dl        |
| Triglycerides (median)      | 121 mg/dl        |
| Glucose levels (median)     | 101 mg/dl        |
| Fibrinogen (median)         | 6.7 mg/dl        |
| Homocysteine (median)       | 12.2 $\mu$ mol/L |
| Proteinuria (median)        | 110.2 mg/24h     |
| Baseline NIHSS (median)     | 5                |
| NIHSS at discharge (median) | 1                |
| Baseline mRS (median)       | 1                |
| mRS at discharge (median)   | 1                |

**Supplemental Table III.** SNPs associated with ischemic stroke recurrence under a dominant-recessive model in the Discovery cohort A; SNPs associated with vascular recurrence under a dominant-recessive model in the Discovery cohort A; SNPs associated with vascular recurrence under an additive model.

|                    |            |                | <b>Ischemic Stroke Recurrence Dom/Rec model.</b>     |                       |           |                    |
|--------------------|------------|----------------|------------------------------------------------------|-----------------------|-----------|--------------------|
|                    |            |                | % Recurrence. Discovery cohort (n=1.494 )            |                       |           |                    |
| <b>NEARBY GENE</b> | <b>SNP</b> | <b>RG</b>      | <b>RG in cases</b>                                   | <b>RG in controls</b> | <b>HZ</b> | <b>Pvalue</b>      |
| <i>NOTCH2</i>      | rs10923931 | T carriers> GG | 8.4                                                  | 3.4                   | 2.641     | 0.013              |
| <i>SMAD3</i>       | rs17228212 | CC> T carriers | 9.5                                                  | 4                     | 2.519     | 0.04               |
| <i>SERPINE1</i>    | rs1799768  | GG> - carriers | 8                                                    | 2.8                   | 3         | 0.001              |
| <i>LEPR</i>        | rs1137101  | AA> G carriers | 6.7                                                  | 3.1                   | 2.275     | 0.042              |
| <i>HMGCR</i>       | rs12654264 | AA> T carriers | 6.6                                                  | 3.2                   | 2.157     | 0.026              |
| <i>CDKN2B-AS1</i>  | rs1333049  | GG> C carriers | 10                                                   | 2.2                   | 5         | 0.022              |
| <i>APOB</i>        | rs1367117  | AA> G carriers | 9.4                                                  | 3.6                   | 2.76      | 0.04               |
| <i>ADIPOQ</i>      | rs1501299  | AA> C carriers | 10.3                                                 | 3.9                   | 2.863     | 0.017              |
| <i>PROC</i>        | rs1799810  | T carriers> AA | 6.5                                                  | 1.3                   | 5.221     | 0.003              |
| <i>LRP1</i>        | rs1800168  | CC> T carriers | 9.1                                                  | 3.9                   | 2.479     | 0.045              |
| <i>NOS3</i>        | rs1800779  | G carriers> AA | 5.6                                                  | 2.2                   | 2.609     | 0.043              |
| <i>NOS3</i>        | rs2257090  | AA> G carriers | 9.8                                                  | 3.8                   | 2.79      | 0.039              |
| <i>MMP12</i>       | rs2276109  | GG> A carriers | 16.7                                                 | 4.2                   | 4.613     | 0.03               |
| <i>NOS3</i>        | rs310586   | GG> A carriers | 7.1                                                  | 3.1                   | 2.396     | 0.028              |
| <i>APOB</i>        | rs7575840  | TT> G carriers | 11.5                                                 | 3.8                   | 3.317     | 0.009              |
| <i>CHD2</i>        | rs961233   | AA> G carriers | 9.4                                                  | 0.8                   | 12.396    | 0.005              |
| <i>CNTN3</i>       | rs9808232  | GG/ T carriers | 6                                                    | 1.6                   | 3.982     | 0.017              |
|                    |            |                | <b>Vascular Recurrence Dom/Rec model.</b>            |                       |           |                    |
|                    |            |                | % Vascular Recurrence. Discovery cohort A (n=1.494 ) |                       |           |                    |
| <b>NEARBY GENE</b> | <b>SNP</b> | <b>RG</b>      | <b>RG in cases</b>                                   | <b>RG in controls</b> | <b>OR</b> | <b>Pvalue</b>      |
| <i>ALOX5AP</i>     | rs10507391 | AA>T carriers  | 12.5                                                 | 6.5                   | 2.056     | 0.03               |
| <i>VWF</i>         | rs1063856  | AA> G carriers | 10.2                                                 | 5.6                   | 1.931     | 0.033              |
| <i>IL1B</i>        | rs1143634  | TT> C carriers | 22.2                                                 | 6.9                   | 3.841     | 0.004              |
| <i>SMAD3</i>       | rs17228212 | CC> T carriers | 14.3                                                 | 6.9                   | 2.243     | 0.026              |
| <i>SERPINE1</i>    | rs1799768  | GG> - carriers | 11.4                                                 | 5.4                   | 2.251     | 0.003              |
| <i>PPARGC1</i>     | rs8192678  | G carriers >AA | 8.1                                                  | 2.1                   | 4.036     | 0.039              |
| <i>ADIPOQ</i>      | rs1501299  | AA> C carriers | 13.8                                                 | 6.7                   | 2.213     | 0.038              |
| <i>IL1A</i>        | rs1800587  | TT> C carriers | 17.5                                                 | 7.1                   | 2.763     | 0.02               |
| <i>NOS3</i>        | rs1800779  | G carriers> AA | 8.9                                                  | 4                     | 2.315     | 0.022              |
| <i>APOC3</i>       | rs2854117  | AA> G carriers | 15.9                                                 | 6.4                   | 2.755     | 0.018              |
| <i>APOB</i>        | rs7575840  | TT> G carriers | 17.3                                                 | 6.8                   | 2.848     | 0.006              |
| <i>CHD2</i>        | rs961233   | AA> G carriers | 11.3                                                 | 3.3                   | 3.702     | 0.041              |
| <i>CNTN3</i>       | rs9819617  | CC> T carriers | 22.2                                                 | 4.4                   | 6.163     | 0.003              |
|                    |            |                | <b>Vascular Recurrence additive model.</b>           |                       |           |                    |
|                    |            |                | % Recurrence. Discovery cohort A (n=1.494)           |                       |           |                    |
| <b>NEARBY GENE</b> | <b>SNP</b> | <b>RA</b>      | <b>RA in cases</b>                                   | <b>RA in controls</b> | <b>HZ</b> | <b>P (K-Meyer)</b> |
| <i>THBD</i>        | rs1042579  | T              | 16.7                                                 | 15.3                  | 1.108     | 0.006              |
| <i>ENPP1</i>       | rs1044498  | C              | 6.4                                                  | 6.1                   | 1.05      | 0.005              |
| <i>P2RY1</i>       | rs1065776  | T              | 9.4                                                  | 6.6                   | 1.469     | 0.003              |
| <i>NOTCH2</i>      | rs10923931 | T              | 7.6                                                  | 6.5                   | 1.178     | 0.001              |
| <i>IL1B</i>        | rs1143634  | T              | 7.2                                                  | 6.2                   | 1.176     | 1.09E-04           |
| <i>PDE4D</i>       | rs1396476  | T              | 6.5                                                  | 5.2                   | 1.283     | 0.030              |

|                 |            |   |      |     |       |          |
|-----------------|------------|---|------|-----|-------|----------|
| <i>FGF2</i>     | rs1449683  | T | 6.9  | 6   | 1.154 | 0.008    |
| <i>GSTP1</i>    | rs1695     | A | 6.6  | 6.3 | 1.048 | 0.017    |
| <i>APOB</i>     | rs1713222  | C | 6.7  | 5.9 | 1.157 | 0.024    |
| <i>MC4R</i>     | rs17782313 | T | 7    | 5.3 | 1.353 | 0.022    |
| <i>SERPINE1</i> | rs1799768  | G | 7.3  | 5.1 | 1.471 | 5.50E-06 |
| <i>PROC</i>     | rs1799810  | A | 6.9  | 5.9 | 1.18  | 0.026    |
| <i>LRP1</i>     | rs1800127  | T | 12.5 | 6.5 | 2.044 | 0.021    |
| <i>IL1A</i>     | rs1800587  | T | 7.1  | 6.6 | 1.076 | 0.001    |
| <i>LIPC</i>     | rs1800588  | C | 6.5  | 5.4 | 1.215 | 0.013    |
| <i>FGB</i>      | rs1800790  | G | 6.8  | 4.9 | 1.422 | 0.012    |
| <i>MGP</i>      | rs1800801  | G | 6.1  | 5.9 | 1.04  | 0.010    |
| <i>IL10</i>     | rs1800896  | A | 6.8  | 6.1 | 1.114 | 0.033    |
| <i>MTHFR</i>    | rs1801131  | A | 6.4  | 5.7 | 1.131 | 0.029    |
| <i>A2M</i>      | rs1805651  | G | 5.8  | 5   | 1.176 | 0.040    |
| <i>PLAT</i>     | rs2020918  | C | 6.6  | 6.1 | 1.092 | 0.025    |
| <i>IL9</i>      | rs2069885  | T | 8.2  | 6.1 | 1.377 | 1.23E-04 |
| <i>MMP9</i>     | rs2236416  | A | 6.2  | 5.9 | 1.051 | 0.018    |
| <i>ADIPOQ</i>   | rs2241766  | T | 7.1  | 5.6 | 1.302 | 0.043    |
| <i>NOS3</i>     | rs2243428  | A | 6.4  | 5.3 | 1.209 | 0.035    |
| <i>MMP13</i>    | rs2252070  | G | 7.2  | 6.2 | 1.181 | 0.001    |
| <i>NOS3</i>     | rs2257073  | C | 6.5  | 5.4 | 1.207 | 0.021    |
| <i>MMP9</i>     | rs2274755  | T | 6.7  | 6.3 | 1.054 | 0.004    |
| <i>MMP12</i>    | rs2276109  | G | 7.1  | 6.1 | 1.175 | 1.78E-04 |
| <i>IL5RA</i>    | rs2290608  | G | 6.4  | 5.5 | 1.184 | 0.009    |
| <i>VKORC1</i>   | rs2359612  | G | 6.8  | 5.9 | 1.159 | 0.005    |
| <i>NOS3</i>     | rs2435608  | A | 6.7  | 5.1 | 1.336 | 0.036    |
| <i>PDE4D</i>    | rs2910829  | T | 6.8  | 6.4 | 1.066 | 0.012    |
| <i>NOS3</i>     | rs310586   | G | 7    | 5.6 | 1.273 | 0.001    |
| <i>GST</i>      | rs3211206  | C | 6.5  | 4.6 | 1.453 | 0.001    |
| <i>CX3CR1</i>   | rs3732379  | C | 6.4  | 6   | 1.061 | 0.007    |
| <i>APOE</i>     | rs405509   | C | 6.9  | 6.5 | 1.066 | 0.017    |
| <i>IGFBP2</i>   | rs4402960  | T | 7.1  | 6   | 1.21  | 2.13E-04 |
| <i>ANP</i>      | rs5065     | A | 6.6  | 5   | 1.36  | 0.037    |
| <i>AGTR1</i>    | rs5186     | A | 6.3  | 5.8 | 1.094 | 0.033    |
| <i>SELE</i>     | rs5355     | T | 9.4  | 6.5 | 1.486 | 0.001    |
| <i>SELE</i>     | rs5361     | C | 7.9  | 6.2 | 1.298 | 0.002    |
| <i>EDN1</i>     | rs5370     | G | 6.2  | 5.1 | 1.228 | 0.047    |
| <i>APOB</i>     | rs563280   | T | 9.1  | 4.5 | 2.12  | 0.002    |
| <i>FGA</i>      | rs6050     | G | 6.7  | 6.1 | 1.104 | 0.001    |
| <i>CDKAL1</i>   | rs6931514  | G | 4.7  | 3.8 | 1.244 | 9.00E-03 |
| <i>CHD2</i>     | rs7164668  | T | 7.4  | 4   | 1.909 | 0.027    |
| <i>CHD2</i>     | rs7173103  | T | 7.4  | 4   | 1.909 | 0.027    |
| <i>APOE</i>     | rs7412     | T | 7.4  | 6.6 | 1.13  | 0.026    |
| <i>PON2</i>     | rs7493     | G | 6.8  | 6.4 | 1.068 | 0.005    |
| <i>IMPA2</i>    | rs7506045  | T | 7    | 6.7 | 1.05  | 0.006    |
| <i>APOB</i>     | rs7575840  | T | 8.1  | 6.2 | 1.332 | 6.17E-04 |
| <i>PPARGC1</i>  | rs8192678  | G | 6.5  | 6.1 | 1.055 | 0.013    |

**Supplemental Table IV.** SNPs associated with ischemic stroke recurrence under an additive model in the Discovery cohort A.

| NEARBY GENE        | SNP        | RA | % Recurrence. Discovery cohort (n=989 ) |                  |       | Pvalue   |
|--------------------|------------|----|-----------------------------------------|------------------|-------|----------|
|                    |            |    | % RA in cases                           | % RA in controls | HZ    |          |
| <i>SI00B</i>       | rs1051169  | C  | 4                                       | 3.9              | 1.207 | 0.046    |
| <i>ITGA2</i>       | rs1126643  | T  | 4.8                                     | 4.4              | 1.118 | 0.026    |
| <i>CRP</i>         | rs1130864  | T  | 4.3                                     | 4.2              | 1.017 | 0.04     |
| <i>LDLR</i>        | rs11668477 | G  | 4.7                                     | 4.5              | 1.027 | 0.042    |
| <i>CRP</i>         | rs1205     | T  | 4.6                                     | 4.1              | 1.136 | 0.007    |
| <i>LRP1</i>        | rs12307379 | T  | 5.1                                     | 4                | 1.297 | 0.037    |
| <i>GCKR</i>        | rs1260326  | T  | 4.5                                     | 3.7              | 1.217 | 0.01     |
| <i>CDKN2B</i>      | rs1333049  | G  | 6.6                                     | 1.9              | 3.568 | 0.011    |
| <i>PDE4D</i>       | rs1396476  | T  | 4.8                                     | 2.8              | 1.736 | 0.024    |
| <i>MC4R</i>        | rs17782313 | T  | 4.7                                     | 3.1              | 1.559 | 0.044    |
| <i>SERPINE1</i>    | rs1799768  | G  | 5.6                                     | 2.8              | 2.070 | 4.36E-06 |
| <i>PROC</i>        | rs1799810  | T  | 5.1                                     | 4.5              | 1.127 | 0.012    |
| <i>CYP11B2</i>     | rs1799998  | T  | 5.3                                     | 3.4              | 1.573 | 0.002    |
| <i>PPARA</i>       | rs1800206  | G  | 4.8                                     | 4                | 1.213 | 0.033    |
| <i>LIPC</i>        | rs1800588  | T  | 5.4                                     | 4                | 1.362 | 0.001    |
| <i>NOS3</i>        | rs1800779  | G  | 5.6                                     | 3.9              | 1.460 | 3.35E-04 |
| <i>FGB</i>         | rs1800790  | G  | 4.7                                     | 3.1              | 1.541 | 0.039    |
| <i>MGP</i>         | rs1800801  | G  | 4.6                                     | 3.5              | 1.334 | 0.009    |
| <i>MTHFR</i>       | rs1801131  | C  | 5.2                                     | 4                | 1.300 | 0.004    |
| <i>Intergenic</i>  | rs180117   | T  | 4.7                                     | 3.7              | 1.291 | 0.023    |
| <i>NEUROD1</i>     | rs1801262  | G  | 5.2                                     | 3.5              | 1.526 | 0.007    |
| <i>CD40</i>        | rs1883832  | T  | 4.8                                     | 4                | 1.207 | 0.006    |
| <i>IL9</i>         | rs2069885  | T  | 5.1                                     | 4.1              | 1.251 | 0.021    |
| <i>PITX2.ENPEP</i> | rs2200733  | T  | 6.4                                     | 4                | 1.614 | 0.003    |
| <i>PLAU</i>        | rs2227564  | C  | 3.2                                     | 0.9              | 3.584 | 0.005    |
| <i>MMP9</i>        | rs2236416  | G  | 5                                       | 4                | 1.252 | 0.019    |
| <i>MMP13</i>       | rs2252070  | G  | 5.2                                     | 3.6              | 1.465 | 0.003    |
| <i>MMP9</i>        | rs2274755  | T  | 5.7                                     | 4                | 1.456 | 0.003    |
| <i>MMP12</i>       | rs2276109  | G  | 8.5                                     | 3.7              | 2.394 | 2.24E-08 |
| <i>HIF1AN</i>      | rs2295778  | G  | 6.8                                     | 3.7              | 1.917 | 7.31E-06 |
| <i>VKORC1</i>      | rs2359612  | G  | 4.6                                     | 3.9              | 1.173 | 0.043    |
| <i>CD14</i>        | rs2569190  | G  | 4.3                                     | 3.8              | 1.148 | 0.037    |
| <i>PDE4D</i>       | rs2910829  | T  | 4.7                                     | 4.2              | 1.138 | 0.042    |
| <i>VEGFA</i>       | rs3024994  | T  | 6.4                                     | 4.3              | 1.512 | 0.018    |
| <i>VEGFA</i>       | rs3025000  | T  | 5                                       | 4                | 1.262 | 0.012    |
| <i>VEGFA</i>       | rs3025010  | T  | 4.6                                     | 4                | 1.165 | 0.047    |
| <i>VEGFA</i>       | rs3025033  | G  | 7.2                                     | 4.2              | 1.758 | 0.001    |
| <i>NOS3</i>        | rs310586   | G  | 5.3                                     | 3.3              | 1.674 | 0.001    |
| <i>GST</i>         | rs3211206  | C  | 4.2                                     | 3.4              | 1.250 | 0.021    |
| <i>IGFBP2</i>      | rs4402960  | T  | 5.2                                     | 4.1              | 1.280 | 0.004    |
| <i>ADD1</i>        | rs4961     | T  | 5.1                                     | 3.9              | 1.327 | 0.009    |
| <i>ANP</i>         | rs5065     | G  | 5                                       | 4.2              | 1.185 | 0.01     |
| <i>AGTR1</i>       | rs5186     | C  | 5.3                                     | 3.8              | 1.389 | 0.003    |
| <i>SELE</i>        | rs5355     | T  | 6.3                                     | 4.5              | 1.421 | 0.038    |
| <i>APOB</i>        | rs576203   | G  | 5                                       | 3.4              | 1.494 | 0.038    |
| <i>PROS1</i>       | rs6123     | G  | 4.6                                     | 4.4              | 1.060 | 0.037    |
| <i>A2M</i>         | rs669      | G  | 5                                       | 4                | 1.279 | 0.005    |



|              |           |   |     |     |       |          |
|--------------|-----------|---|-----|-----|-------|----------|
| APOB         | rs693     | T | 5.9 | 3.7 | 1.632 | 0.001    |
| CDKAL1       | rs6931514 | A | 2.9 | 2.7 | 1.100 | 0.006    |
| PDE4D        | rs702553  | A | 3.9 | 3.8 | 1.035 | 0.038    |
| CHD2         | rs7164668 | T | 6.1 | 2.4 | 2.597 | 0.041    |
| CHD2         | rs7173103 | T | 6.1 | 2.4 | 2.597 | 0.042    |
| SERPINE1     | rs7242    | T | 4.4 | 3.4 | 1.317 | 0.011    |
| LRP1         | rs7398375 | G | 5   | 3.6 | 1.399 | 0.002    |
| PON2         | rs7493    | G | 5   | 4.4 | 1.144 | 0.025    |
| IMPA2        | rs7506045 | T | 7   | 4.4 | 1.642 | 0.002    |
| APOB         | rs7575840 | T | 7.2 | 3.5 | 2.135 | 2.01E-06 |
| TCF7L2       | rs7903146 | T | 5   | 4.4 | 1.084 | 0.035    |
| TSPAN8. LGR5 | rs7961581 | T | 4.8 | 3.7 | 1.307 | 0.026    |
| PPARGC1      | rs8192678 | G | 4.5 | 3.7 | 1.241 | 0.025    |

**Supplemental Table V.** Clinical and demographic variables for the VISP cohort.

Categorical variables and continuous variables.

| <b>Clinical and demographic variables. Categorical variables.</b> | <b>Frequency (n)</b>   |
|-------------------------------------------------------------------|------------------------|
| <i>Clinical variables at enrollment</i>                           |                        |
| Female                                                            | 36.4% (765)            |
| Tobacco use                                                       | N/A                    |
| Current Smokers                                                   | 15.6% (328)            |
| Alcohol intake                                                    | 59.8% (1256)           |
| Low physical activity                                             | N/A                    |
| Presence of Hypertension                                          | 72.1% (1515)           |
| Presence of Dyslipidemia                                          | N/A                    |
| Presence of Diabetes Mellitus                                     | 27.1% (570)            |
| Previous Angina Pectoris                                          | N/A                    |
| Previous Myocardial Infarction (MI)                               | N/A                    |
| Previous Atrial Fibrillation                                      | N/A                    |
| Previous Carotid Stenosis (>50%)                                  | N/A                    |
| Previous Leukoaraiosis                                            | N/A                    |
| Previous Deep Venous Thrombosis                                   | N/A                    |
| Previous Diabetic Nephropathy                                     | N/A                    |
| Previous Dementia                                                 | N/A                    |
| Previous Migraine                                                 | N/A                    |
| Previous Sleep Apnea Syndrome                                     | N/A                    |
| Familial Antecedents of Stroke                                    | 23.2% (488)            |
| Familial Antecedents of MI or Angina Pectoris                     | N/A                    |
| Familial Antecedents of Dementia                                  | N/A                    |
| <i>Clinical variables after recruitment</i>                       | N/A                    |
| Inclusion TIA                                                     | N/A                    |
| Carotid revascularization                                         | N/A                    |
| Presence of intracranial stenosis                                 | N/A                    |
| Administration of rt-PA                                           | N/A                    |
| Vascular Recurrence                                               | N/A                    |
| Ischemic Stroke Recurrence                                        | 8.7% (182)             |
| TOAST                                                             | N/A                    |
| Cardioembolic                                                     | N/A                    |
| Atherothrombotic                                                  | N/A                    |
| Lacunar                                                           | N/A                    |
| Undetermined                                                      | N/A                    |
| Clopidogrel administration                                        | N/A                    |
| Diuretics administration                                          | N/A                    |
| B-blockers administration                                         | N/A                    |
| Oral antidiabetic drugs administration                            | N/A                    |
| <b>Clinical and demographic variables. Continuous variables.</b>  |                        |
| <i>Clinical variables at enrollment</i>                           |                        |
| Number of Individuals<br>(EA/AA/other)                            | 2100<br>(1725/258/117) |
| Age (yrs)<br>Mean $\pm$ S.D.<br>Median                            | 67.2 $\pm$ 10.8<br>68  |

|                             |               |
|-----------------------------|---------------|
| range                       | 35-89         |
| Weight (kilograms, median)  | 79.37         |
| Height (cm, median)         | 170.18        |
| Red blood cells (count)     | N/A           |
| Hemoglobin (mean)           | N/A           |
| Platelets (count)           | N/A           |
| Leukocytes (count)          | N/A           |
| Cholesterol (median)        | 200 mg/dl     |
| HDL (median)                | 43 mg/dl      |
| LDL (median)                | 120 mg/dl     |
| Triglycerides (median)      | 150 mg/dl     |
| Glucose levels (mean)       | N/A           |
| Fibrinogen (median)         | 400 mg/dL     |
| Homocysteine (median)       | 12.2 (umol/L) |
| Proteinuria                 | N/A           |
| Baseline NIHSS (median)     | 1             |
| NIHSS at discharge (median) | N/A           |
| Baseline mRS (median)       | 1             |
| mRS at discharge (median)   | N/A           |

**Supplemental Table VI. Clinical and demographic description variables Replication cohorts**

B+C. Categorical variables and continuous variables.

| <b>Clinical and demographic variables. Categorical variables.</b> | <b>Frequency (n)</b>             |
|-------------------------------------------------------------------|----------------------------------|
| <i>Clinical variables at enrollment</i>                           |                                  |
| Female                                                            | 34% (453)                        |
| Tobacco use                                                       | 28.3% (370)                      |
| Alcohol intake                                                    | NA                               |
| Low physical activity                                             | NA                               |
| Presence of Hypertension                                          | 60.6% (791)                      |
| Presence of Dyslipidemia                                          | 30.3% (396)                      |
| Presence of Diabetes Mellitus                                     | 23.5% (307)                      |
| Previous Angina Pectoris                                          | NA                               |
| Previous Myocardial Infarction (MI)                               | NA                               |
| Previous Atrial Fibrillation                                      | 30.8% (403)                      |
| Previous Carotid Stenosis (>50%)                                  | NA                               |
| Previous Leukoaraiosis                                            | NA                               |
| Previous Deep Venous Thrombosis                                   | NA                               |
| Previous Diabetic Nephropathy                                     | NA                               |
| Previous Dementia                                                 | NA                               |
| Previous Migraine                                                 | NA                               |
| Previous Sleep Apnea Syndrome                                     | NA                               |
| Familial History of Stroke                                        | NA                               |
| Familial History of MI or Angina Pectoris                         | NA                               |
| Familial History of Dementia                                      | NA                               |
| <i>Clinical variables after recruitment</i>                       |                                  |
| Inclusion TIA                                                     | NA                               |
| Carotid revascularization                                         | NA                               |
| Presence of intracranial stenosis                                 | NA                               |
| Administration of rt-PA                                           | 100% (1305)                      |
| Vascular Recurrence                                               | 25.5% (334)                      |
| Ischemic Stroke Recurrence                                        | 14.5% (190)                      |
| TOAST                                                             |                                  |
| Large Vessel Stroke                                               | 23.3% (304)                      |
| Cardioembolism                                                    | 45.2% (590)                      |
| Small Vessel Disease                                              | 12.7% (166)                      |
| Undetermined                                                      | 20.7% (271)                      |
| Undetermined >2 causes                                            | NA                               |
| Undetermined (study completed)                                    | NA                               |
| Undetermined (uncompleted study)                                  | NA                               |
| Clopidogrel administration                                        | NA                               |
| Diuretics administration                                          | NA                               |
| B-blockers administration                                         | NA                               |
| Oral antidiabetic drugs administration                            | NA                               |
| <b>Clinical and demographic variables. Continuous variables.</b>  |                                  |
| <i>Clinical variables at enrollment</i>                           |                                  |
| Age, years (mean)                                                 | 71 years (17-97 years) median 73 |
| Weight (kilograms, mean)                                          | NA                               |
| Height (cm)                                                       | NA                               |

|                             |                           |
|-----------------------------|---------------------------|
| Red blood cells (count)     | NA                        |
| Hemoglobin (mean)           | NA                        |
| Platelets (count)           | NA                        |
| Leukocytes (count)          | NA                        |
| Cholesterol (mean)          | NA                        |
| HDL (mean)                  | NA                        |
| LDL (mean)                  | NA                        |
| Triglycerides (mean)        | NA                        |
| Glucose levels (mean)       | 135.54 mg/dl (median 123) |
| Fibrinogen (mean)           | NA                        |
| Homocysteine (mean)         | NA                        |
| Proteinuria                 | NA                        |
| Baseline NIHSS (median)     | 15                        |
| NIHSS at discharge (median) | 5                         |
| Baseline mRS (median)       | NA                        |
| mRS at discharge (median)   | NA                        |

Supplemental Figure I. Hospitals that participated in the GRECOS study.

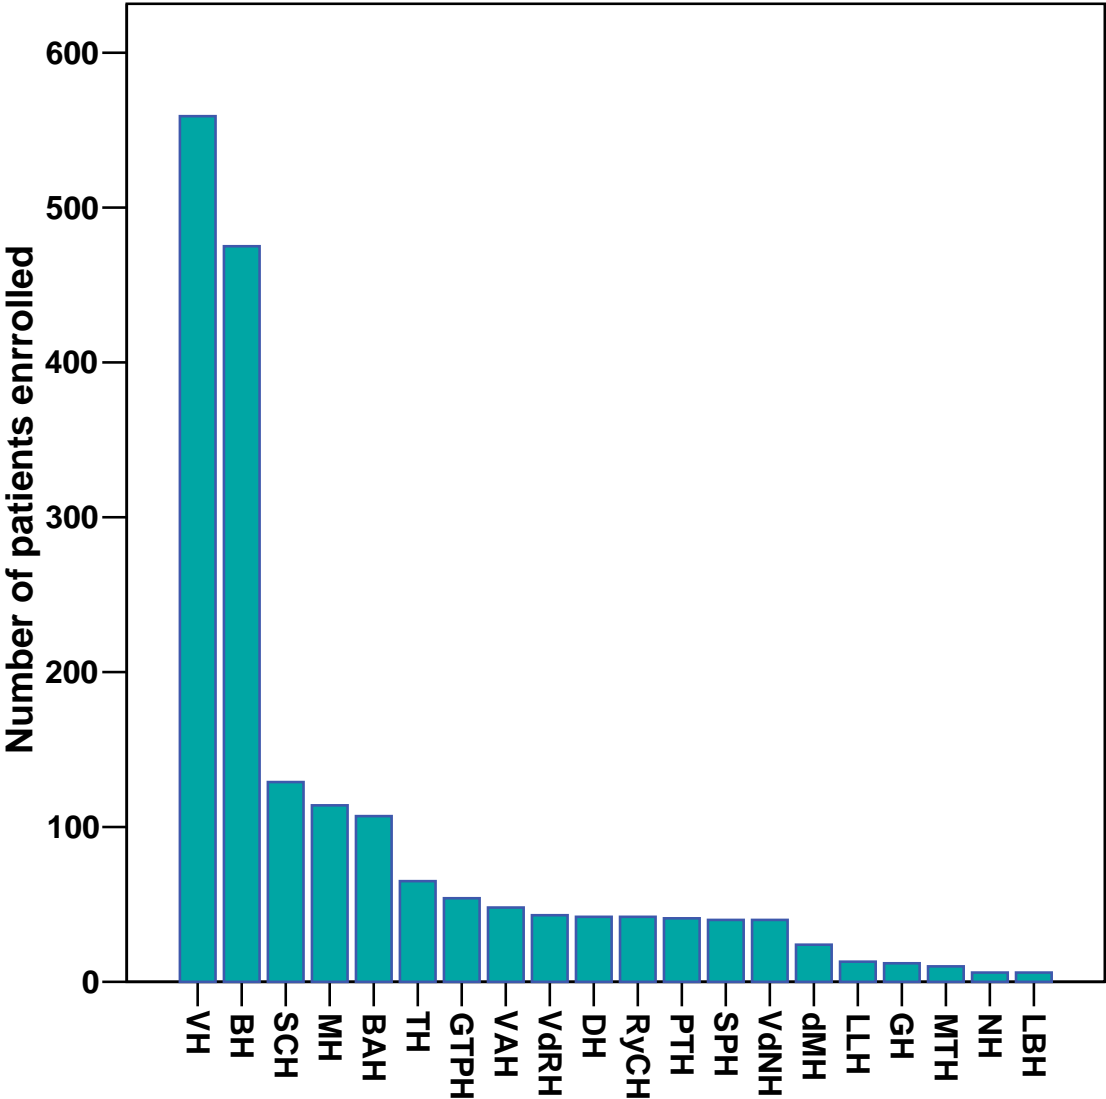

Supplement: NIHMS861713-supplement-Supplemental_Material.pdf [file NIHMS861713-supplement-Supplemental_Material.pdf]
